# Supplementary material for: ATGL-LC3B-Lipid Complexes Mediate Lipophagy-Driven Radioprotection Against Metabolic Liver Injury in Adolescents
Source: Research Square preprint supplement (doi:10.21203/rs.3.rs-7033545/v1), 2025-08-08

**ATGL-LC3B-Lipid Complexes Mediate Lipophagy-Driven Radioprotection Against Metabolic Liver Injury in Adolescents**

Yu Feng Zhang a, 1, Ze Lin Xua, 1, Chen Wanga, Ji Yu Xu a, Yu Xu a, Yi Qi Yia, Po Bian a*, Ting Wang a *

*a**Teaching and Research Section of Nuclear Medicine, School of Basic Medical Sciences, Anhui Medical University, Hefei 230032, China.*

*1 Equal contribution.*

*** ***Corresponding Author.*** *To whom correspondence should be addressed to* [*wangting@ahmu.edu.cn,*](mailto:wangting@ahmu.edu.cn,) *bianpo@ahmu.edu.cn.*

***Correspondence to:****Teaching and Research Section of Nuclear Medicine, School of Basic Medical Sciences, Anhui Medical University, Hefei 230032, China.*

***Affiliation of author(s):*** *Teaching and Research Section of Nuclear Medicine, School of Basic Medical Sciences, Anhui Medical University, Hefei 230032, China.*

***Clinical trial number:*** *not applicable.*

***Supplementary materials include:*** *Figure S1, S2, Table1, Table2, original drawing of WB*


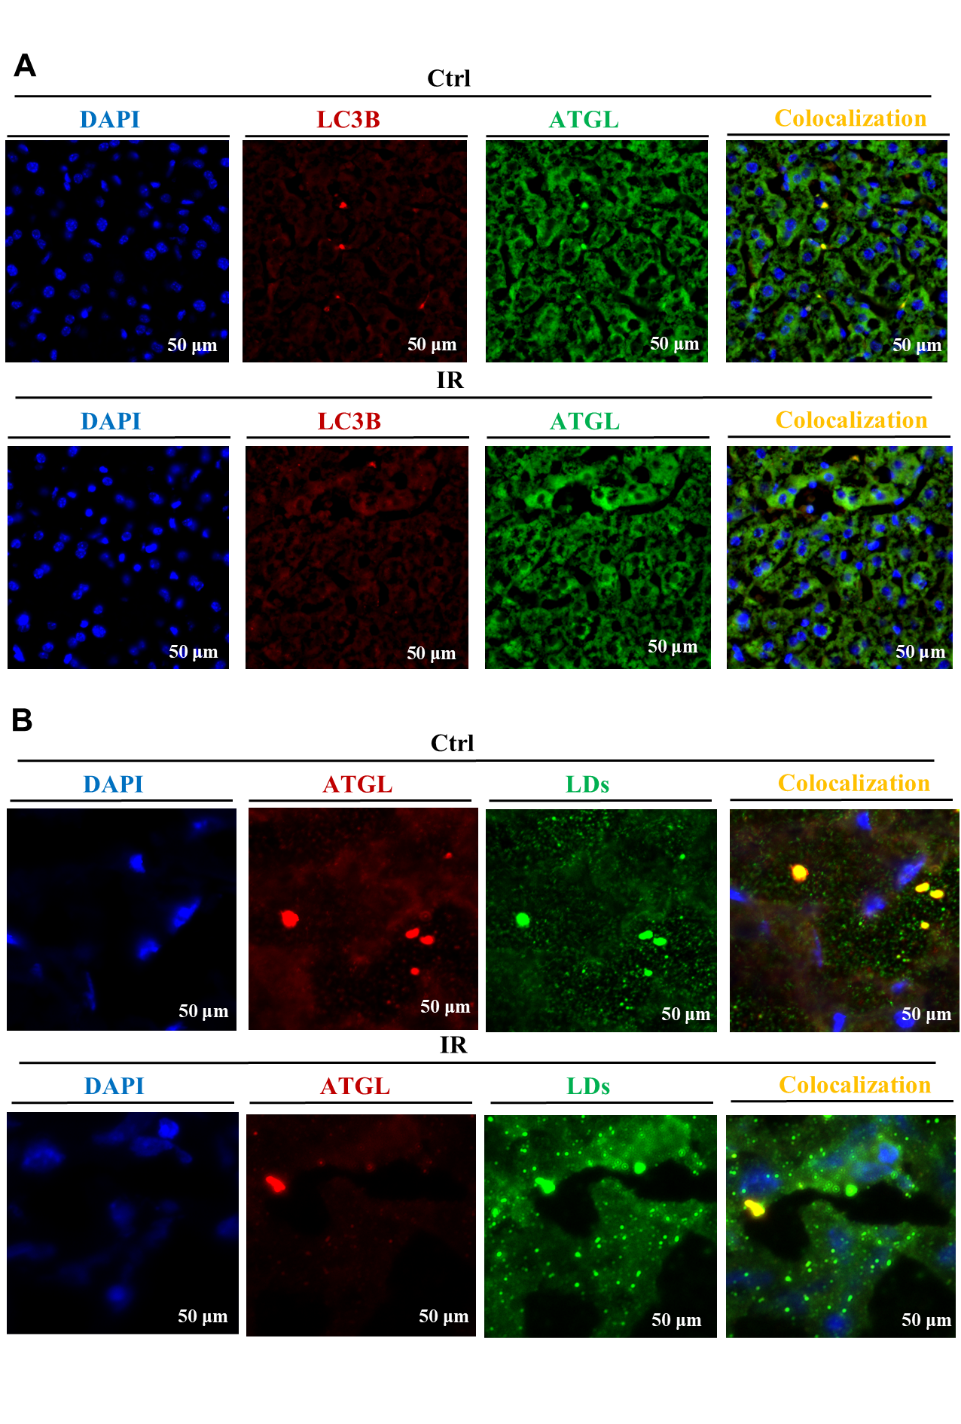


**Figure S1.** (A) Representative fluorescence co-localization picture of LC3B and ATGL in mouse liver. Scale bar: 50 μm; LC3B is red, ATGL is green. (B) Representative fluorescence co-localization picture of ATGL and LDs in mouse liver. Scale bar: 50 μm; Scale bar: 50 μm; ATGL is red, LDs is green. Data were shown as *MEAN ± SD*. * *P* < 0.05 vs. Ctrl mice. # *P* < 0.05 vs. IR mice.


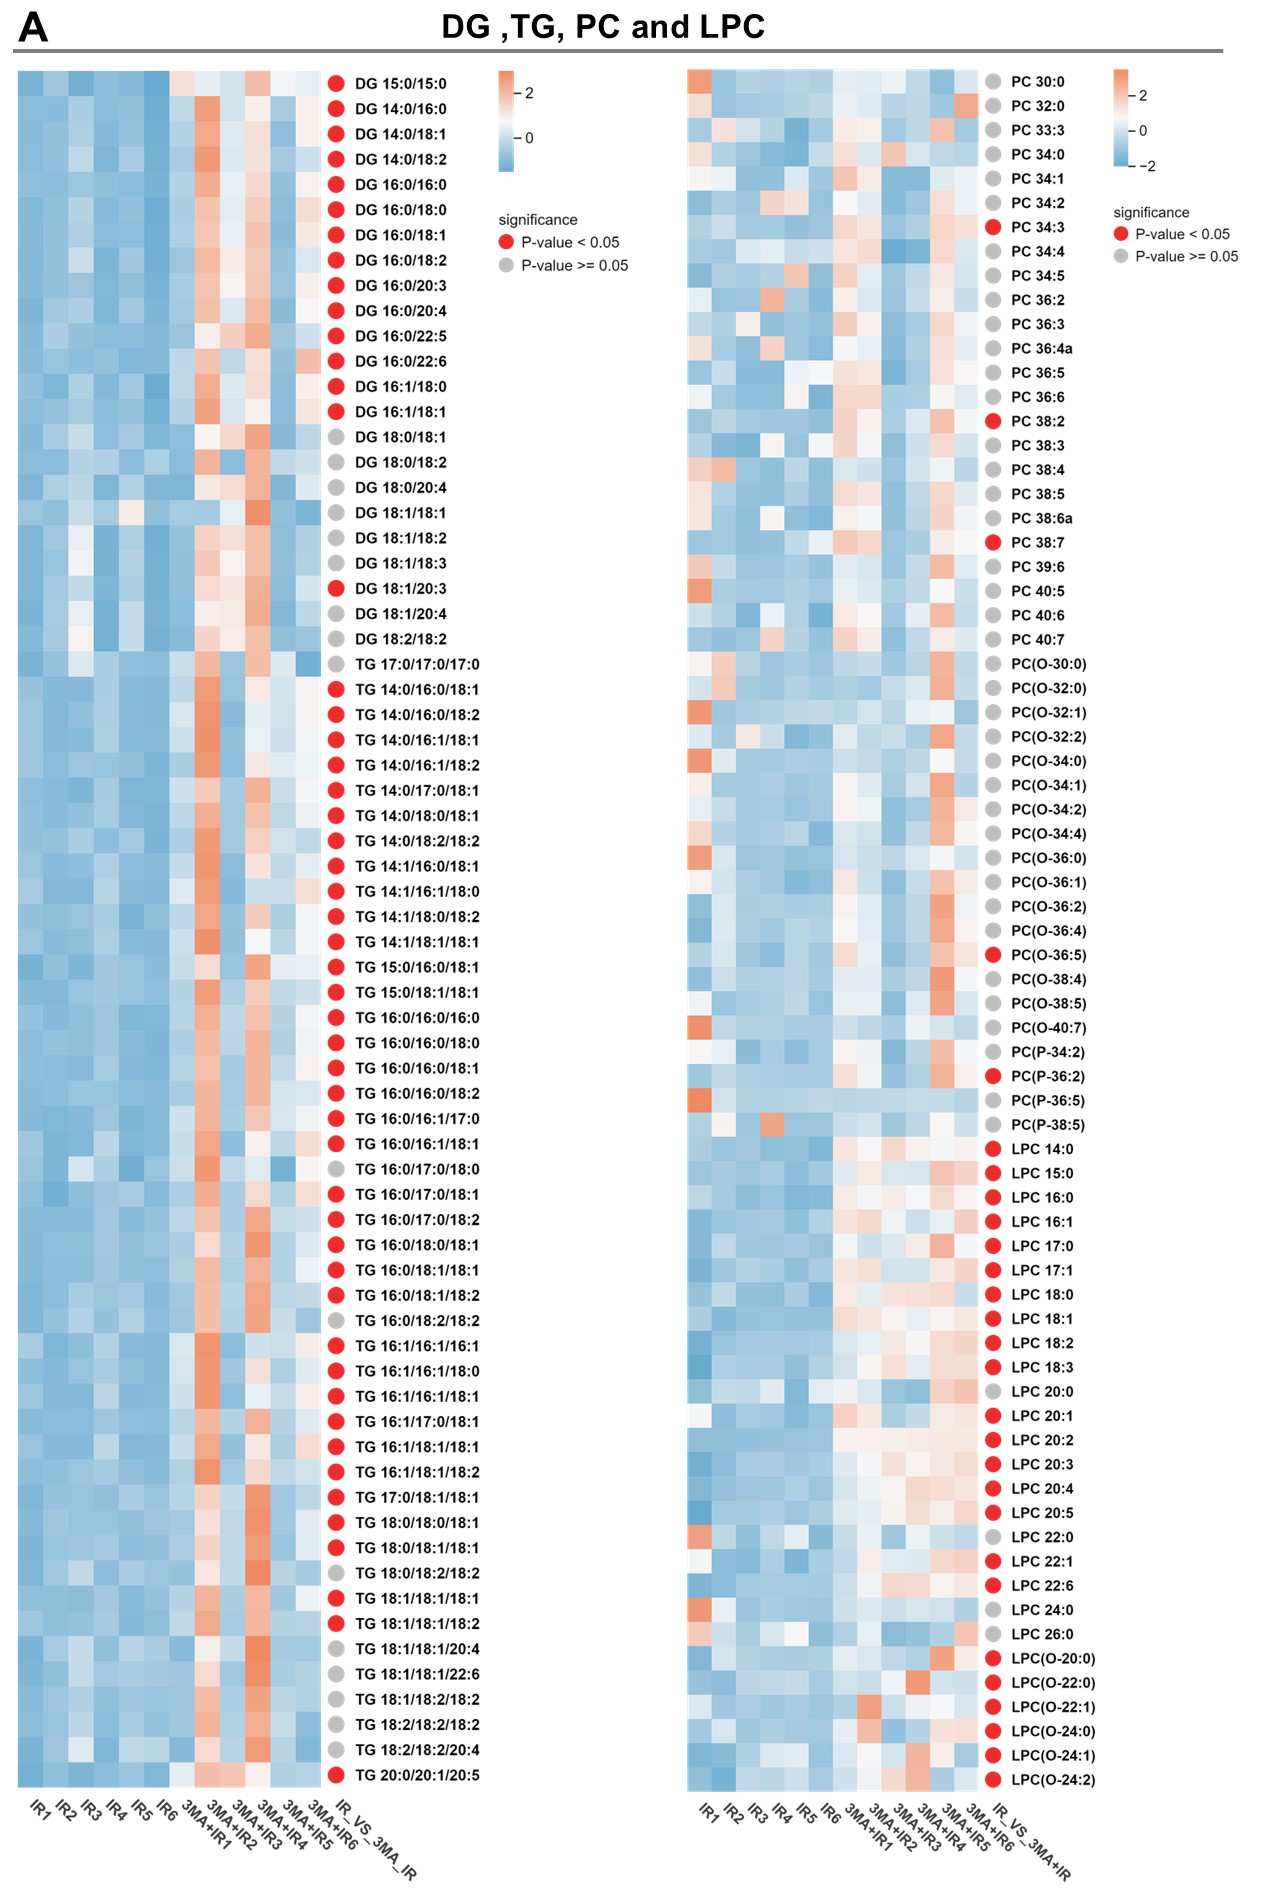


**Figure S2.** (A and B) Heatmap of DG, TG, PC and LPC lipid content in mouse liver (n=6).


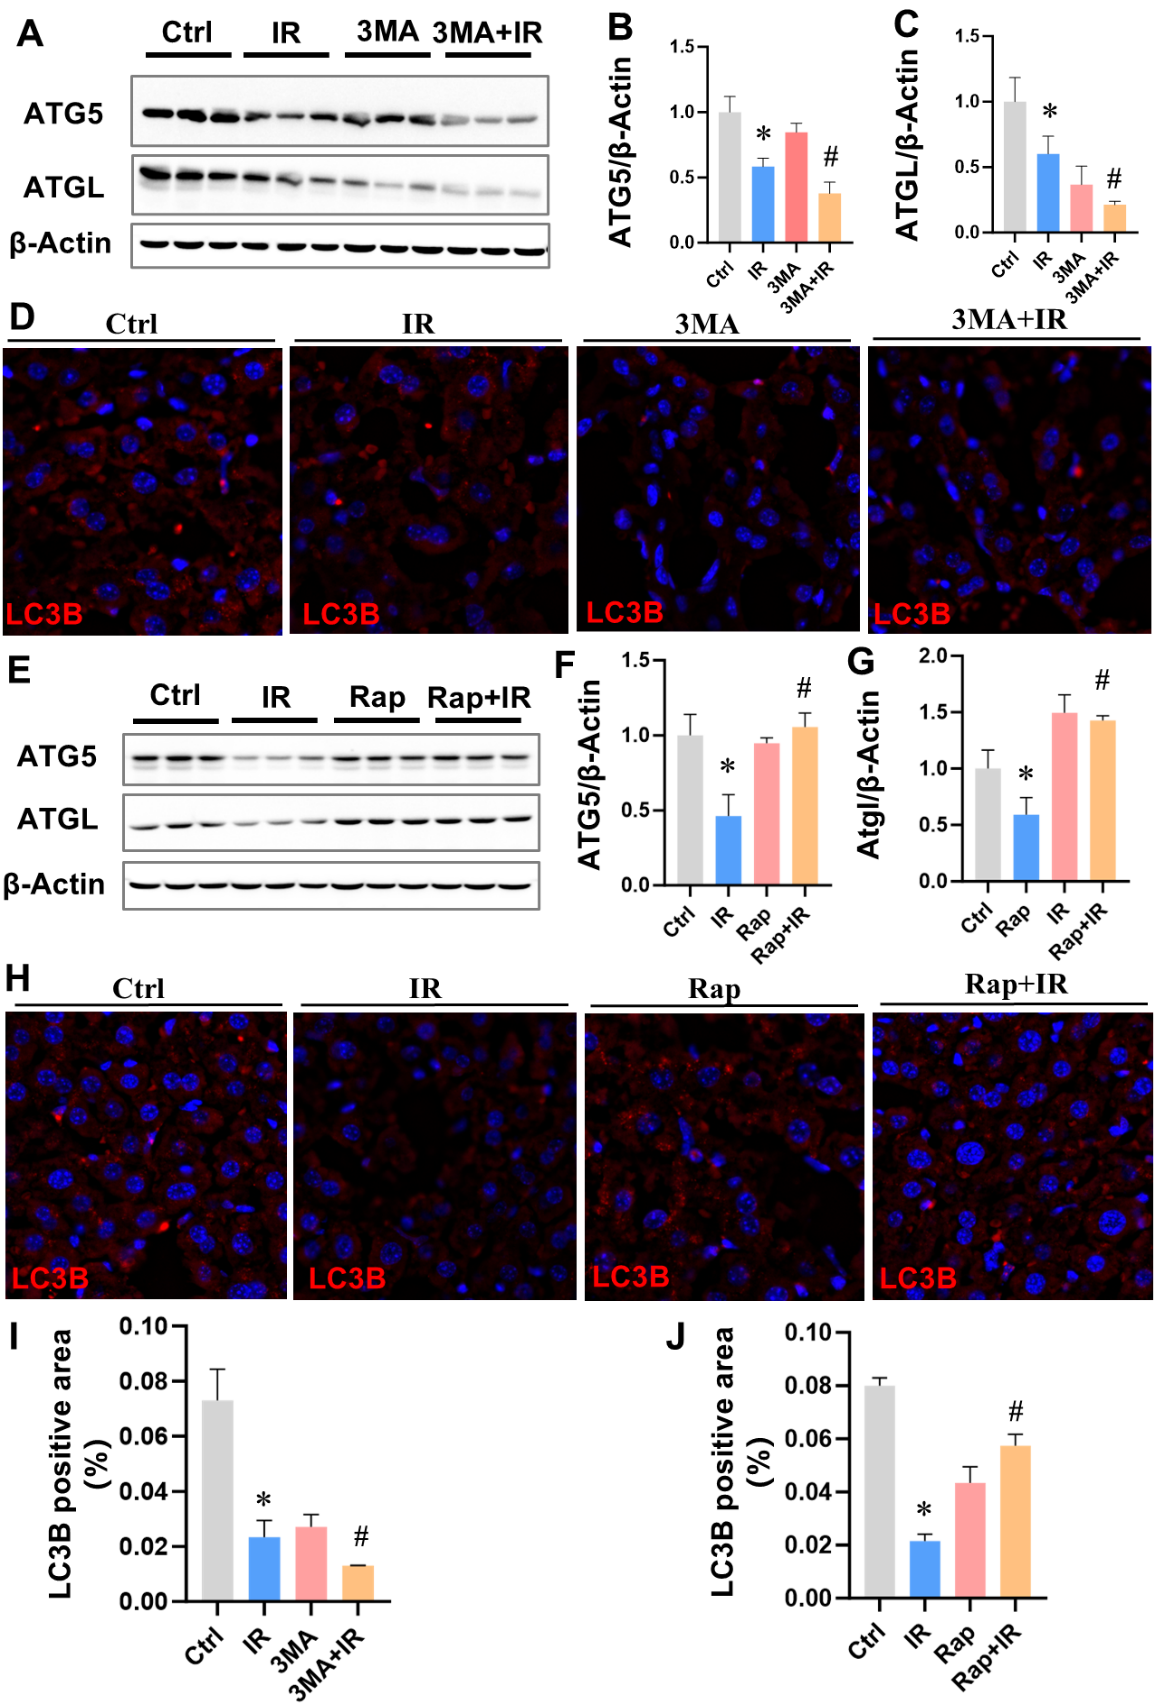


**Figure S3.** (A) Representative Western blot images of ATG5 and ATGL in the mouse liver. (B and C) Quantification of ATG5 and ATGL proteins. (D) Representative immunofluorescence images of LC3B in the mouse liver. Scale bar: 20 μm; LC3B is red. (E) Representative Western blot images of ATG5 and ATGL in the mouse liver. (F and G) Quantification of ATG5 and ATGL proteins. (H) Representative immunofluorescence images of LC3B in the mouse liver. Scale bar: 20 μm; LC3B is red. (I and J) LC3B in the mouse liver with the ratio of positive area. Data were shown as MEAN ± SD. * *P* < 0.05 vs. Ctrl mice. # *P* < 0.05 vs. IR mice.


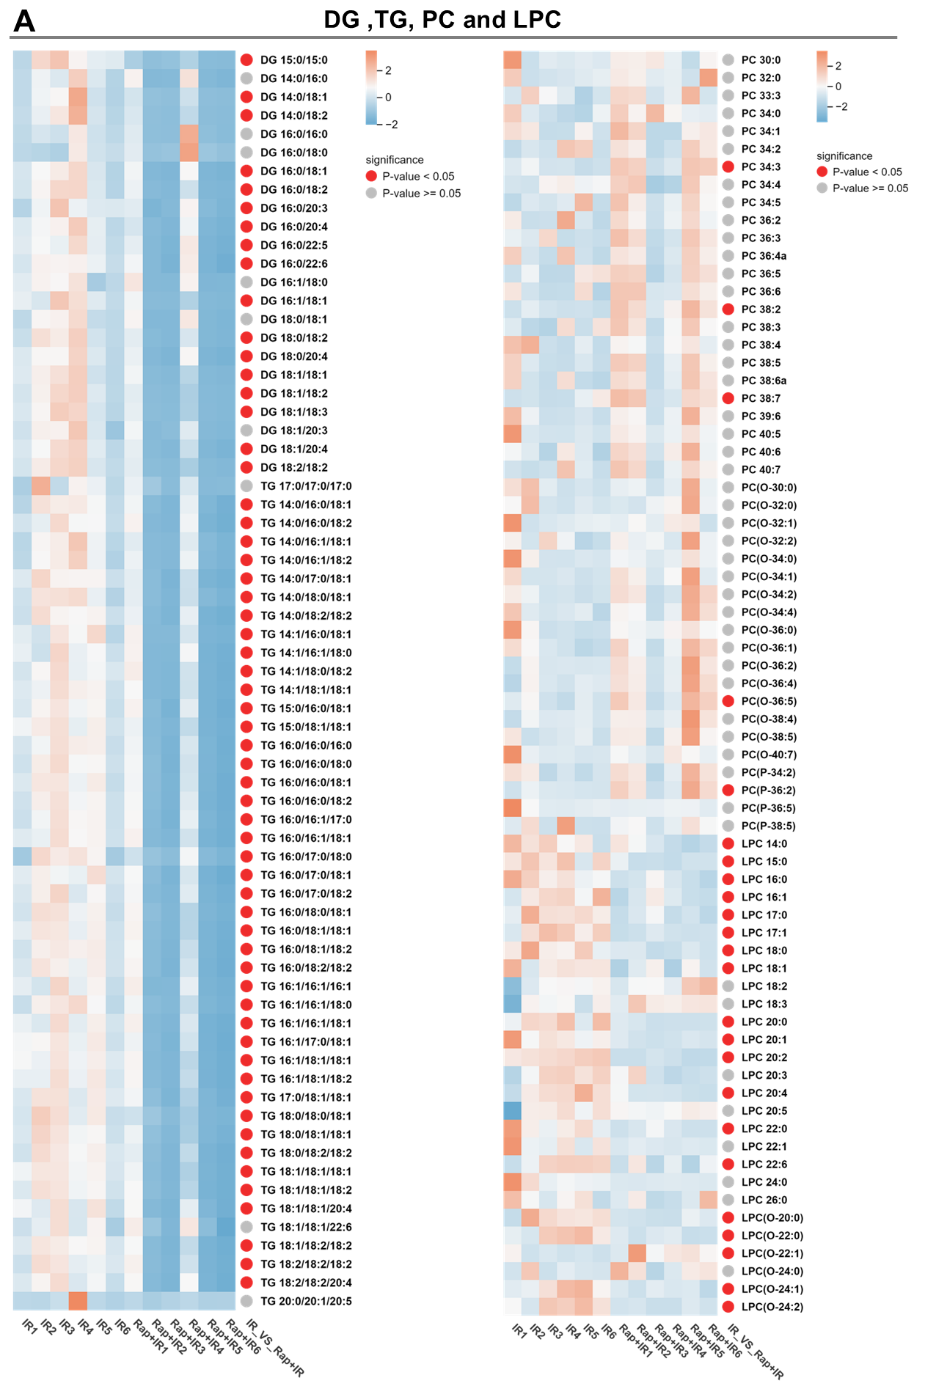


**Figure S4.** (A and B) Heatmap of DG, TG, PC and LPC lipid content in mouse liver (n=6).

**Table 1** **Main chemical reagents and antibodies**

| **Reagent name** | **Company name** | **Art.No.** |
| --- | --- | --- |
| 3-Methyladenine  Rapamycin | Med Chem Express  Med Chem Express | 19312  10219 |
| BODIPY | Med Chem Express | 216434-81-0 |
| Atgl | Abcam | ab207799 |
| Atg5 | Abcam | ab108327 |
| p62 | Cell Signaling Technology | 5114s |
| LC3B-I/II | Abcam | ab48394 |
| β-Actin | Cell Signaling Technology | 4970s |

**Table 2** **A list of primers related to lipophagy genes.**

| **Gene** | **Sequence (5’-3’)** | **Species** | **Company name** |
| --- | --- | --- | --- |
| *Atgl*  (F)  (R) | GGATGGCGGCATTTCAGACA  CAAAGGGTTGGGTTGGTTCAG | mice | Gene pharma |
| *Atg5*  (F)  (R) | TGTGCTTCGAGATGTGTGGTT  GTCAAATAGCTGACTCTTGGCAA | mice | Gene pharma |
| *Atg8*  (F)  (R) | TTATAGAGCGATACAAGGGGGAG  CGCCGTCTGATTATCTTGATGAG | mice | Gene pharma |

ATG5


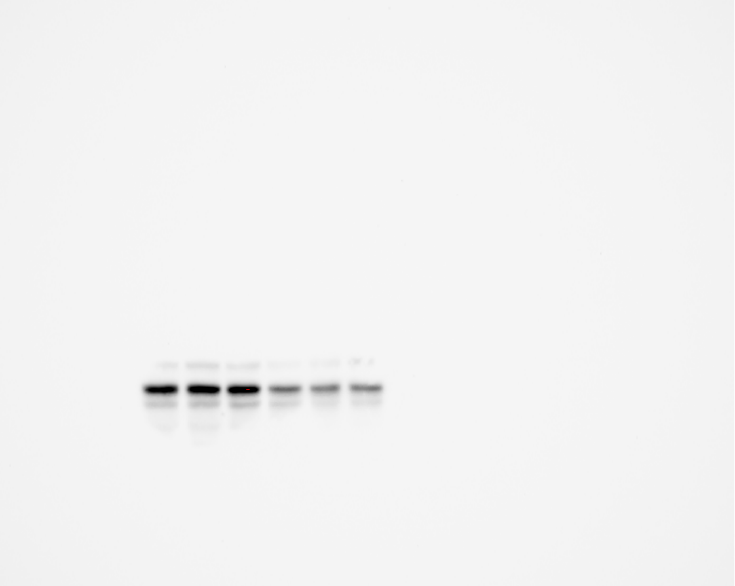


ATGL


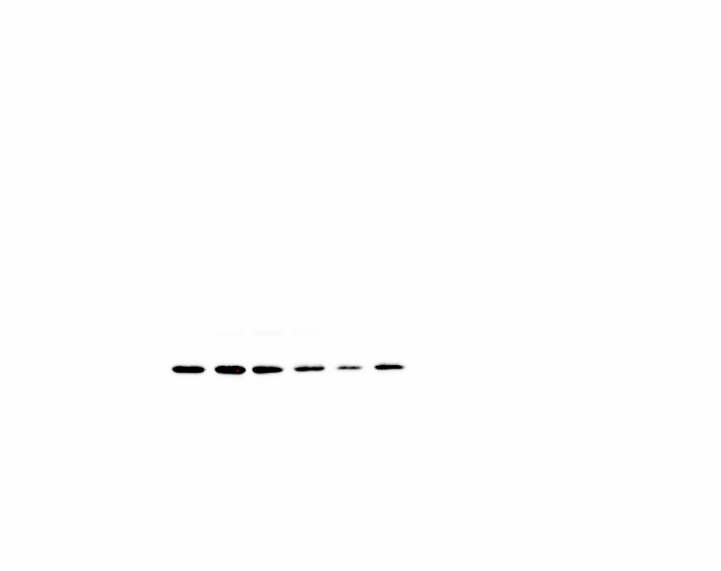


P62


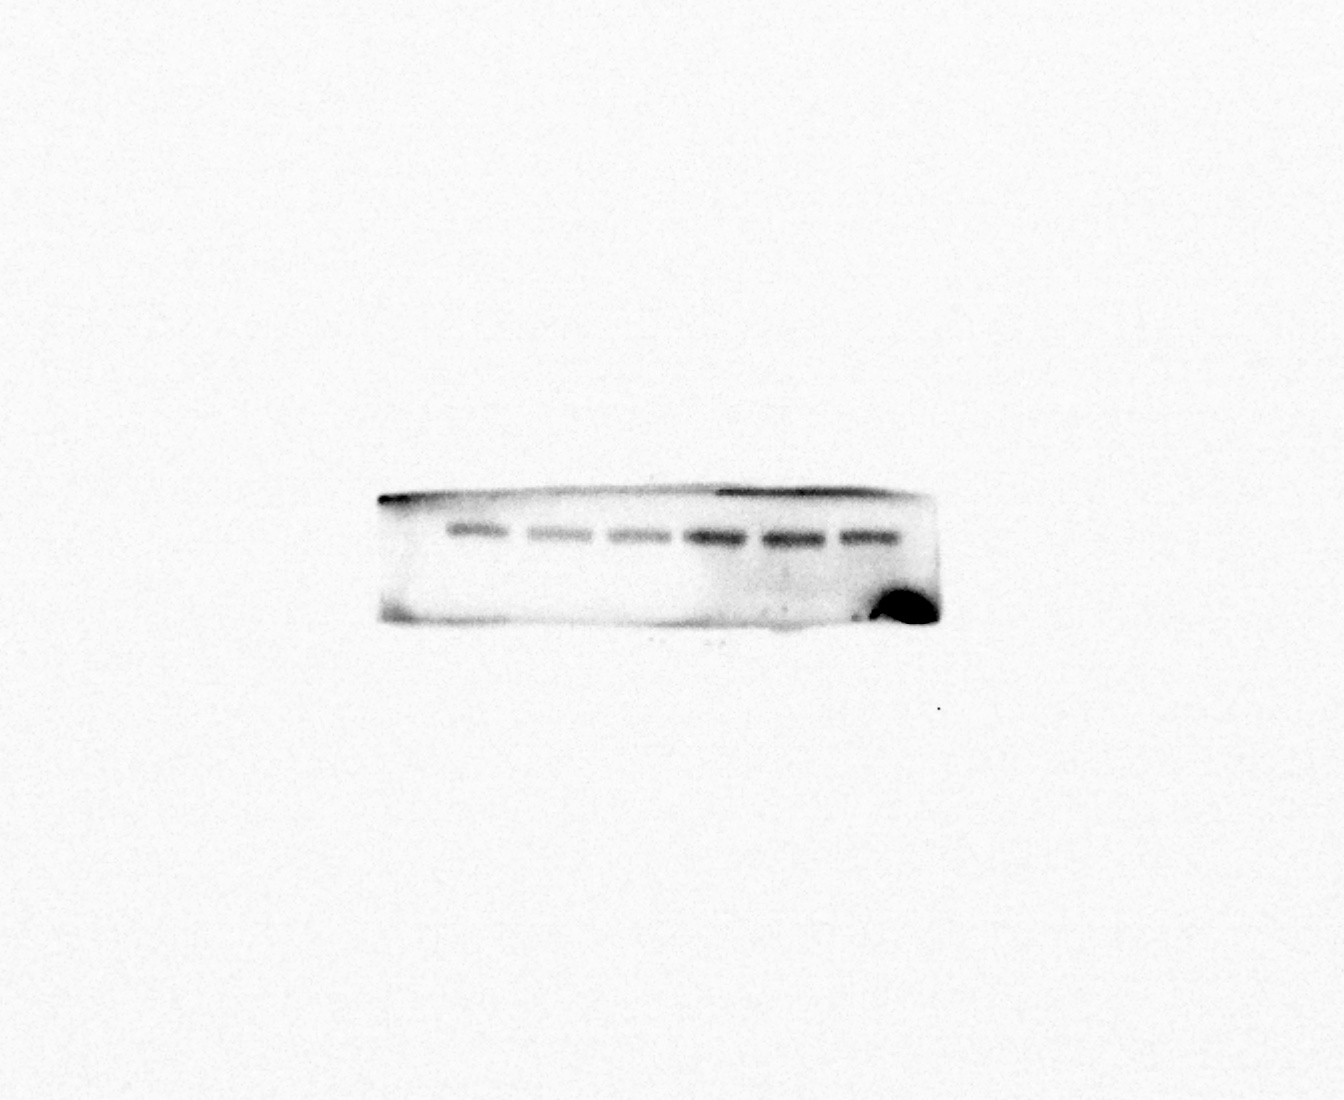


LC3B


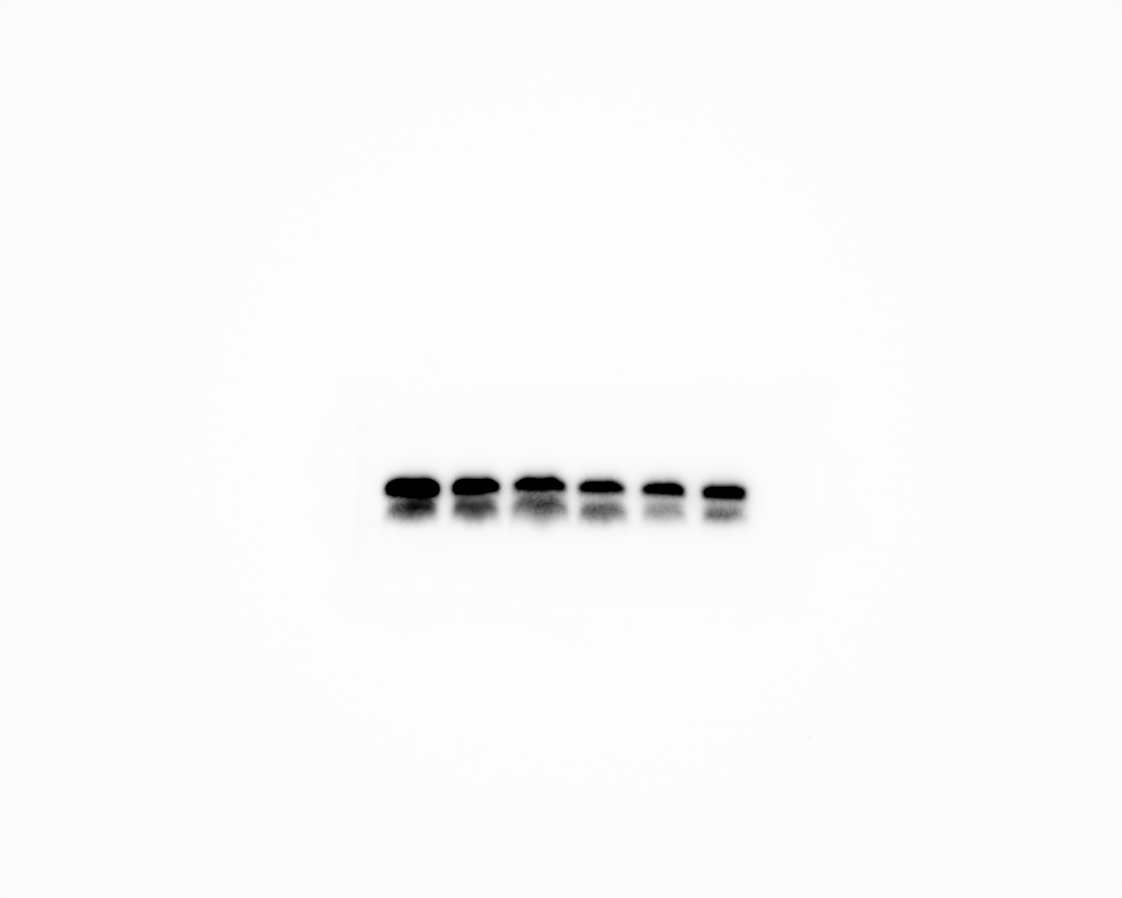


Actin


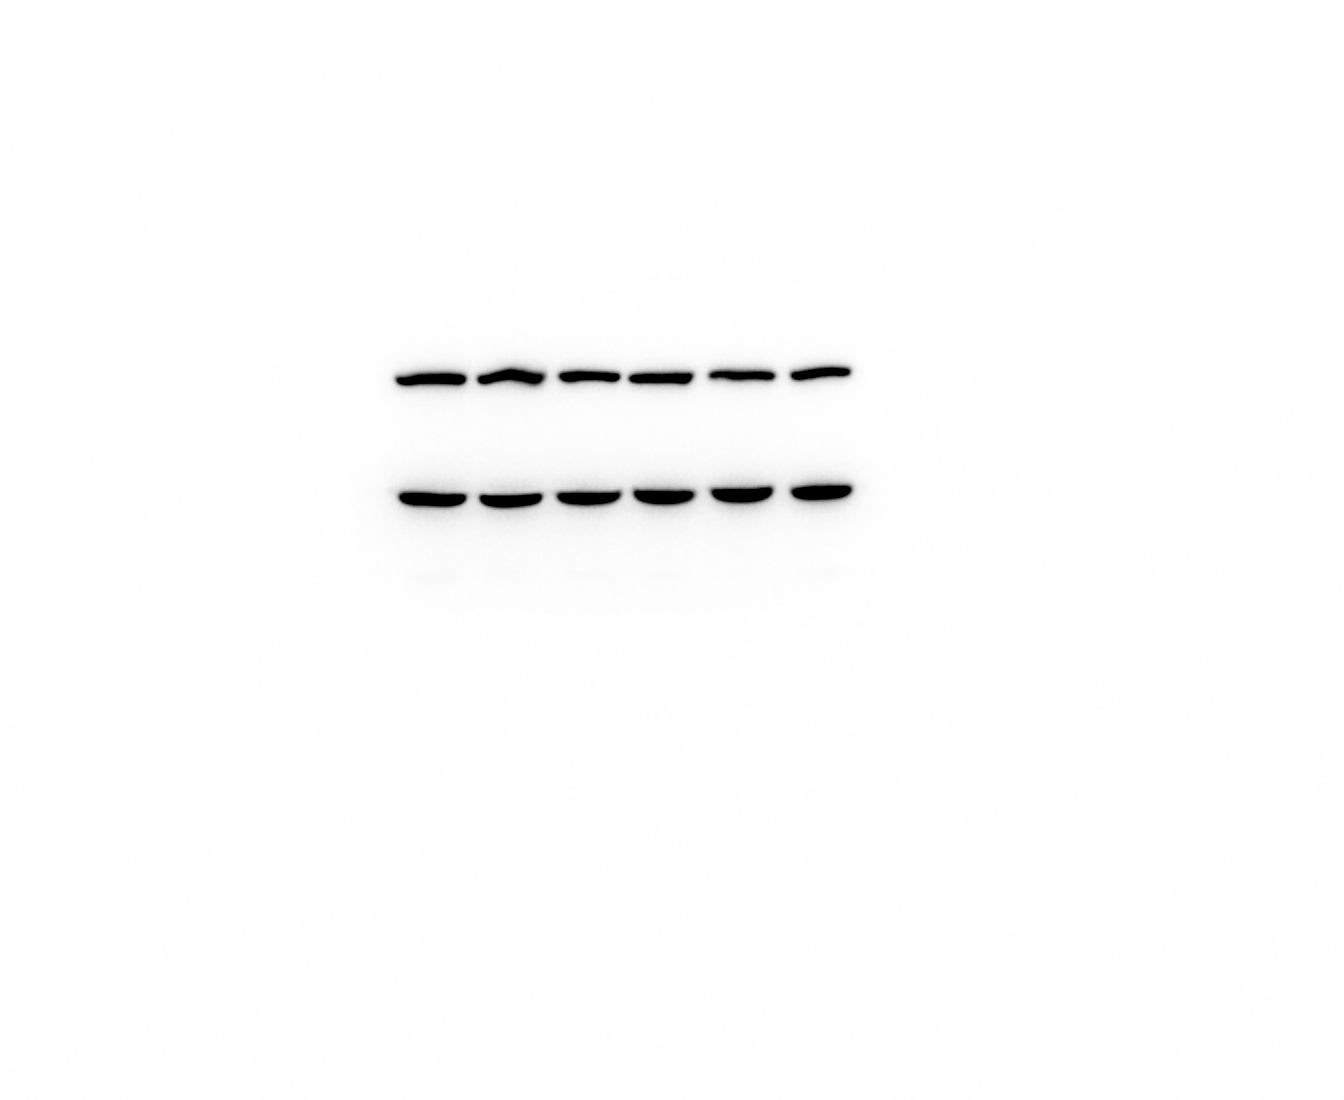

Supplement: Supplementary file 1 [file 3dafa393eb294a1888f657c7.docx]
